# Supplementary material for: Pb2Al2B3O8F3: structure and properties of a new fluoroaluminoborate with non-traditional chain-like B3O8 groups
Source: Royal Society of Chemistry journal article supplement (doi:10.1039/d1dt04312a), 2022-01-01
Supplement: d1dt04312a1.pdf [file d1dt04312a1.pdf]

## *Supporting Information*

### **Pb<sub>2</sub>Al<sub>2</sub>B<sub>3</sub>O<sub>8</sub>F<sub>3</sub>: Structure and Properties of a New Fluoroaluminoborate with Non-traditional Chain-like B<sub>3</sub>O<sub>8</sub> Group**

Bao Jiang,<sup>†a</sup> Shan Shu,<sup>†a,b</sup> Zhihua Yang,<sup>a,b</sup> Fangfang Zhang,<sup>a,b</sup> Min Zhang,<sup>\*a,b</sup> and Shilie Pan<sup>\*a,b</sup>

a. *CAS Key Laboratory of Functional Materials and Devices for Special Environments; Xinjiang Technical Institute of Physics & Chemistry, CAS; Xinjiang Key Laboratory of Electronic Information Materials and Devices, 40-1 South Beijing Road, Urumqi 830011, China. E-mails: zhangmin@ms.xjb.ac.cn (M. Zhang) · slpan@ms.xjb.ac.cn (S. L. Pan)*

b. *Center of Materials Science and Optoelectronics Engineering, University of Chinese Academy of Sciences, Beijing 100049, China.*

<sup>†</sup> *These authors contributed equally.*

**Table S1** The final Atomic coordinates ( $\times 10^4$ ) and equivalent isotropic displacement parameters ( $\text{\AA}^2 \times 10^3$ ) for  $\text{Pb}_2\text{Al}_2\text{B}_3\text{O}_8\text{F}_3$ ,  $U_{\text{eq}}$  is defined as one-third of the trace of the orthogonalized  $U_{ij}$  tensor ( $\times 10^3$ ), and the Bond Valence Sum for each atom in the asymmetric unit.

| <b>Atom</b> | <b>x</b> | <b>y</b> | <b>z</b> | <b><math>U_{\text{eq}}</math></b> | <b>BVS</b> |
|-------------|----------|----------|----------|-----------------------------------|------------|
| Pb(1)       | 2084(1)  | 5119(1)  | 6456(1)  | 10(1)                             | 2.05       |
| Al(1)       | 5252(2)  | 6491(2)  | 5659(2)  | 6(1)                              | 2.84       |
| B(1)        | 8083(7)  | 7286(8)  | 5961(6)  | 8(1)                              | 3.00       |
| B(2)        | 5000     | 3556(10) | 7500     | 3(2)                              | 2.89       |
| F(1)        | 5612(4)  | 8470(4)  | 5168(3)  | 12(1)                             | 0.84       |
| F(2)        | 5000     | 7182(5)  | 7500     | 8(1)                              | 0.92       |
| O(1)        | 3411(4)  | 6993(5)  | 5297(4)  | 9(1)                              | 2.22       |
| O(2)        | 4661(4)  | 4482(5)  | 6212(4)  | 6(1)                              | 1.90       |
| O(3)        | 7095(4)  | 6173(5)  | 6027(4)  | 9(1)                              | 1.96       |
| O(4)        | 3791(4)  | 2541(5)  | 7787(4)  | 10(1)                             | 2.04       |

**Table S2** Bond lengths [Å] and angles [deg] for Pb<sub>2</sub>Al<sub>2</sub>B<sub>3</sub>O<sub>8</sub>F<sub>3</sub>.

|                     |            |                     |            |
|---------------------|------------|---------------------|------------|
| Pb(1)-F(1)#1        | 2.423(3)   | O(3)#2-Pb(1)-O(3)#3 | 144.36(17) |
| Pb(1)-O(1)          | 2.343(4)   | O(4)#4-Pb(1)-O(2)   | 122.57(13) |
| Pb(1)-O(1)          | 2.945(4)   | O(4)#4-Pb(1)-O(3)#3 | 148.15(12) |
| Pb(1)-O(2)          | 2.610(4)   | O(4)#4-Pb(1)-O(3)#2 | 52.90(12)  |
| Pb(1)-O(3)#2        | 2.642(4)   | F(1)-Al(1)-F(2)     | 87.48(19)  |
| Pb(1)-O(3)#3        | 2.692(4)   | F(1)-Al(1)-O(1)     | 85.84(18)  |
| Pb(1)-O(4)#4        | 2.577(4)   | F(1)-Al(1)-O(2)     | 173.3(2)   |
| Pb(1)-O(4)          | 3.052(4)   | F(1)-Al(1)-O(2)#3   | 99.97(18)  |
| Al(1)-F(1)          | 1.802(4)   | F(1)-Al(1)-O(3)     | 89.64(19)  |
| Al(1)-F(2)          | 1.832(2)   | F(2)-Al(1)-Al(1)#3  | 131.55(17) |
| Al(1)-O(1)          | 1.896(4)   | F(2)-Al(1)-O(1)     | 87.83(14)  |
| Al(1)-O(2)#3        | 1.936(4)   | F(2)-Al(1)-O(2)#3   | 171.6(2)   |
| Al(1)-O(2)          | 1.899(4)   | F(2)-Al(1)-O(2)     | 90.11(18)  |
| Al(1)-O(3)          | 1.869(4)   | F(2)-Al(1)-O(3)     | 90.47(13)  |
| B(1)-O(1)#1         | 1.366(7)   | O(1)-Al(1)-O(2)#3   | 88.92(18)  |
| B(1)-O(3)           | 1.369(8)   | O(1)-Al(1)-O(2)     | 87.9(2)    |
| B(1)-O(4)#5         | 1.377(7)   | O(2)-Al(1)-O(2)#3   | 82.07(17)  |
| B(2)-O(2)×2         | 1.479(6)   | O(3)-Al(1)-O(1)     | 175.2(2)   |
| B(2)-O(4)×2         | 1.503(6)   | O(3)-Al(1)-O(2)#3   | 93.35(18)  |
| F(1)#1-Pb(1)-O(2)   | 129.36(12) | O(3)-Al(1)-O(2)     | 96.6(2)    |
| F(1)#1-Pb(1)-O(3)#2 | 124.39(12) | O(2)-B(2)-O(2)#2    | 114.7(6)   |
| F(1)#1-Pb(1)-O(3)#3 | 81.48(12)  | O(2)#2-B(2)-O(4)#2  | 106.2(2)   |
| F(1)#1-Pb(1)-O(4)#4 | 72.13(11)  | O(2)#2-B(2)-O(4)    | 110.4(2)   |
| O(1)-Pb(1)-F(1)#1   | 72.59(13)  | O(2)-B(2)-O(4)#2    | 110.5(2)   |
| O(1)-Pb(1)-O(2)     | 63.97(13)  | O(2)-B(2)-O(4)      | 106.2(2)   |
| O(1)-Pb(1)-O(3)#2   | 90.01(13)  | O(4)-B(2)-O(4)#2    | 108.8(6)   |
| O(1)-Pb(1)-O(3)#3   | 73.85(13)  | O(1)#6-B(1)-O(3)    | 121.7(5)   |
| O(1)-Pb(1)-O(4)#4   | 81.35(13)  | O(1)#6-B(1)-O(4)#8  | 122.3(6)   |
| O(2)-Pb(1)-O(3)#2   | 81.45(12)  | O(3)-B(1)-O(4)#8    | 115.8(5)   |
| O(2)-Pb(1)-O(3)#3   | 62.93(11)  |                     |            |

Symmetry transformations used to generate equivalent atoms:

#1  $x-1/2, -y+3/2, -z+1$ , #2  $-x+1, y, -z+3/2$ , #3  $-x+1, -y+1, -z+1$ , #4  $-x+1/2, y+1/2, z$ ,

#5  $x-1/2, y-1/2, -z+3/2$ , #8  $x+1/2, y+1/2, -z+3/2$

**Table S3** Anisotropic displacement parameters ( $\times 10^3$ ) of  $\text{Pb}_2\text{Al}_2\text{B}_3\text{O}_8\text{F}_3$ .

| Atom  | U <sup>11</sup> | U <sup>22</sup> | U <sup>33</sup> | U <sup>23</sup> | U <sup>13</sup> | U <sup>12</sup> |
|-------|-----------------|-----------------|-----------------|-----------------|-----------------|-----------------|
| Pb(1) | 11(1)           | 10(1)           | 9(1)            | 0(1)            | 1(1)            | -1(1)           |
| Al(1) | 6(1)            | 7(1)            | 6(1)            | -1(1)           | -1(1)           | 0(1)            |
| B(1)  | 5(3)            | 8(3)            | 10(3)           | -1(2)           | -2(2)           | 3(3)            |
| B(2)  | 3(2)            | 3(2)            | 3(2)            | 0               | 0(1)            | 0               |
| F(1)  | 13(1)           | 12(1)           | 12(1)           | 1(1)            | 1(1)            | 0(1)            |
| F(2)  | 10(2)           | 9(2)            | 7(2)            | 0               | 2(2)            | 0               |
| O(1)  | 7(2)            | 13(2)           | 7(2)            | 1(2)            | 1(2)            | 0(2)            |
| O(2)  | 5(2)            | 9(2)            | 5(2)            | -2(1)           | 2(1)            | 0(2)            |
| O(3)  | 11(2)           | 5(2)            | 11(2)           | 1(1)            | -3(2)           | -2(2)           |
| O(4)  | 13(2)           | 12(2)           | 4(2)            | 1(1)            | 1(2)            | -3(2)           |

**Table S4** Aluminum borates in the reported structures.

| No. | Compounds                                                                                          | B-O groups                                   | Space group             | A/B  |
|-----|----------------------------------------------------------------------------------------------------|----------------------------------------------|-------------------------|------|
| 1   | CaZrB(Al <sub>9</sub> O <sub>18</sub> )                                                            | Isolated BO <sub>3</sub>                     | <i>P6<sub>3</sub></i>   | 11   |
| 2   | Na <sub>2</sub> AlBa <sub>4</sub> As <sub>4</sub> O <sub>14</sub>                                  | Isolated BO <sub>4</sub>                     | <i>P2<sub>1</sub>/c</i> | 7    |
| 3   | Al <sub>5</sub> BO <sub>9</sub>                                                                    | Isolated BO <sub>3</sub>                     | <i>Pbam</i>             | 5    |
| 4   | Al <sub>20</sub> B <sub>4</sub> O <sub>36</sub>                                                    | Isolated BO <sub>3</sub>                     | <i>Cmc2<sub>1</sub></i> | 5    |
| 5   | Al <sub>5</sub> O <sub>6</sub> (BO <sub>3</sub> )                                                  | Isolated BO <sub>3</sub>                     | <i>Cmc2<sub>1</sub></i> | 5    |
| 6   | Pb <sub>6</sub> AlF <sub>7</sub> B <sub>2</sub> O <sub>7</sub>                                     | Isolated BO <sub>3</sub>                     | <i>Cmca</i>             | 3.5  |
| 7   | NaFe <sub>3</sub> B <sub>3</sub> Al <sub>6</sub> Si <sub>6</sub> O <sub>30</sub> F                 | Isolated BO <sub>3</sub>                     | <i>R3m</i>              | 3.3  |
| 8   | Li <sub>2</sub> (BaIO <sub>4</sub> )                                                               | Isolated BO <sub>3</sub>                     | <i>P2<sub>1</sub>/c</i> | 3    |
| 9   | Al <sub>4</sub> B <sub>2</sub> O <sub>9</sub>                                                      | Isolated BO <sub>4</sub>                     | <i>Pbam</i>             | 2    |
| 10  | Al <sub>4</sub> B <sub>2</sub> O <sub>9</sub>                                                      | Isolated BO <sub>3</sub> and BO <sub>4</sub> | <i>C2/m</i>             | 2    |
| 11  | Li <sub>3</sub> (AlB <sub>2</sub> O <sub>6</sub> )                                                 | Isolated BO <sub>3</sub>                     | <i>P-1</i>              | 2    |
| 12  | Li <sub>6</sub> Al <sub>2</sub> (BO <sub>3</sub> ) <sub>4</sub>                                    | Isolated BO <sub>3</sub>                     | <i>P-1</i>              | 2    |
| 13  | Li(Al <sub>7</sub> B <sub>4</sub> O <sub>17</sub> )                                                | Isolated BO <sub>3</sub>                     | <i>I4/m</i>             | 2    |
| 14  | Na <sub>2</sub> Al <sub>2</sub> (B <sub>2</sub> O <sub>7</sub> )                                   | Isolated BO <sub>3</sub>                     | <i>P-31c</i>            | 2    |
| 15  | Na <sub>2</sub> (Al <sub>2</sub> B <sub>2</sub> O <sub>7</sub> )                                   | Isolated BO <sub>3</sub>                     | <i>R-3c</i>             | 2    |
| 16  | K <sub>2</sub> (Al <sub>2</sub> B <sub>2</sub> O <sub>7</sub> )                                    | Isolated BO <sub>3</sub>                     | <i>P321</i>             | 2    |
| 17  | (K <sub>0.48</sub> Na <sub>0.52</sub> ) <sub>2</sub> Al <sub>2</sub> B <sub>2</sub> O <sub>7</sub> | Isolated BO <sub>3</sub>                     | <i>P321</i>             | 2    |
| 18  | Rb <sub>2</sub> Al <sub>2</sub> B <sub>2</sub> O <sub>7</sub>                                      | Isolated BO <sub>3</sub>                     | <i>P321</i>             | 2    |
| 19  | Rb <sub>2</sub> (Al <sub>2</sub> B <sub>2</sub> O <sub>7</sub> )                                   | Isolated BO <sub>3</sub>                     | <i>P2<sub>1</sub>/c</i> | 2    |
| 20  | Cs <sub>2</sub> Al <sub>2</sub> B <sub>2</sub> O <sub>7</sub>                                      | Isolated BO <sub>3</sub>                     | <i>P2<sub>1</sub>/c</i> | 2    |
| 21  | CaAlBO <sub>4</sub>                                                                                | Isolated BO <sub>3</sub>                     | <i>Ccc2</i>             | 2    |
| 22  | SrBaIO <sub>4</sub>                                                                                | Isolated BO <sub>3</sub>                     | <i>Pccn</i>             | 2    |
| 23  | $\alpha$ -PbAlBO <sub>4</sub>                                                                      | Isolated BO <sub>3</sub>                     | <i>Pnma</i>             | 2    |
| 24  | $\beta$ -PbAlBO <sub>4</sub>                                                                       | Isolated BO <sub>3</sub>                     | <i>Pbcn</i>             | 2    |
| 25  | K <sub>3</sub> Sr <sub>3</sub> Li <sub>2</sub> Al <sub>4</sub> B <sub>6</sub> O <sub>20</sub> F    | Isolated BO <sub>3</sub>                     | <i>R32</i>              | 2    |
| 26  | K <sub>3</sub> Ba <sub>3</sub> Li <sub>2</sub> Al <sub>4</sub> B <sub>6</sub> O <sub>20</sub> F    | Isolated BO <sub>3</sub>                     | <i>P-62c</i>            | 2    |
| 27  | Rb <sub>3</sub> Ba <sub>3</sub> Li <sub>2</sub> Al <sub>4</sub> B <sub>6</sub> O <sub>20</sub> F   | Isolated BO <sub>3</sub>                     | <i>P-62c</i>            | 2    |
| 28  | Rb <sub>3</sub> Al <sub>3</sub> B <sub>3</sub> O <sub>10</sub> F                                   | Isolated BO <sub>3</sub>                     | <i>P31c</i>             | 2    |
| 29  | BaAl(BO <sub>3</sub> )F <sub>2</sub>                                                               | Isolated BO <sub>3</sub>                     | <i>P6<sub>3</sub>/m</i> | 2    |
| 30  | Cu <sub>2</sub> (AlBO <sub>5</sub> )                                                               | Isolated BO <sub>3</sub>                     | <i>P2<sub>1</sub>/c</i> | 2    |
| 31  | Cu <sub>2</sub> (Al <sub>6</sub> B <sub>4</sub> O <sub>17</sub> )                                  | Isolated BO <sub>3</sub>                     | <i>I4/m</i>             | 2    |
| 32  | AlMg(BO <sub>4</sub> )                                                                             | Isolated BO <sub>4</sub>                     | <i>Pnma</i>             | 2    |
| 33  | NaCa <sub>0.5</sub> (Al <sub>2</sub> B <sub>2</sub> O <sub>7</sub> )                               | Isolated BO <sub>3</sub>                     | <i>P6<sub>3</sub>/m</i> | 1.75 |
| 34  | NaSr <sub>0.5</sub> (Al <sub>2</sub> B <sub>2</sub> O <sub>7</sub> )                               | Isolated BO <sub>3</sub>                     | <i>P6<sub>3</sub>/m</i> | 1.75 |
| 35  | K <sub>0.91</sub> Rb <sub>1.09</sub> Al <sub>2</sub> (B <sub>2</sub> O <sub>7</sub> )              | Isolated BO <sub>3</sub>                     | <i>P321</i>             | 1.5  |
| 36  | Pb <sub>2</sub> Bi <sub>2</sub> AlB <sub>3</sub> O <sub>11</sub>                                   | Isolated BO <sub>3</sub>                     | <i>C2/c</i>             | 1.6  |
| 37  | CaAl <sub>2</sub> (BO <sub>3</sub> ) <sub>2</sub> O                                                | Isolated BO <sub>3</sub>                     | <i>R-3c</i>             | 1.5  |
| 38  | Ca <sub>0.05</sub> Na <sub>1.90</sub> Al <sub>2</sub> B <sub>2</sub> O <sub>7</sub>                | Isolated BO <sub>3</sub>                     | <i>P6<sub>3</sub>/m</i> | 1.5  |
| 39  | Ca <sub>0.69</sub> Na <sub>0.64</sub> Al <sub>2</sub> B <sub>2</sub> O <sub>7</sub>                | Isolated BO <sub>3</sub>                     | <i>P6<sub>3</sub>/m</i> | 1.5  |
| 40  | $\alpha$ -SrAl <sub>2</sub> (B <sub>2</sub> O <sub>7</sub> )                                       | Isolated BO <sub>3</sub>                     | <i>R-3c</i>             | 1.5  |
| 41  | $\beta$ -Sr(Al <sub>2</sub> B <sub>2</sub> O <sub>7</sub> )                                        | Isolated BO <sub>3</sub>                     | <i>R32</i>              | 1.5  |
| 42  | Ba <sub>8</sub> (Al <sub>10</sub> B <sub>12</sub> O <sub>41</sub> )                                | Isolated BO <sub>3</sub>                     | <i>P-1</i>              | 1.5  |

|    |                                                                    |                                                   |            |        |
|----|--------------------------------------------------------------------|---------------------------------------------------|------------|--------|
| 43 | $\text{SnAl}_2(\text{BO}_3)_2\text{F}_2$                           | Isolated $\text{BO}_3$                            | $I4_1/amd$ | 1.5    |
| 44 | $\text{Ba}(\text{Al}_2\text{B}_2\text{O}_7)$                       | Isolated $\text{BO}_3$                            | $R-3c$     | 1.5    |
| 45 | $\text{Al}_8(\text{BO}_3)_4(\text{B}_2\text{O}_5)\text{F}_8$       | Isolated $\text{BO}_3$ and $\text{B}_2\text{O}_5$ | $P42/nmc$  | 1.33   |
| 46 | $\text{Pb}_2\text{Al}_2\text{B}_3\text{O}_8\text{F}_3$             | Isolated $\text{B}_3\text{O}_8$                   | $Pbcn$     | 1.33   |
| 47 | $\text{Li}_4\text{NaKAAl}_4\text{Be}_3\text{B}_{10}\text{O}_{27}$  | Isolated $\text{BO}_3$                            | $P-43m$    | 1.3    |
| 48 | $\text{Al}_6(\text{BO}_3)_5\text{F}_3$                             | Isolated $\text{BO}_3$                            | $P6_3/m$   | 1.2    |
| 49 | $\text{AlBO}_3$                                                    | Isolated $\text{BO}_3$                            | $R-3c$     | 1      |
| 50 | $\text{Li}(\text{AlB}_2\text{O}_5)$                                | Isolated $\text{B}_2\text{O}_5$                   | $C2/c$     | 1      |
| 51 | $\text{YAl}_3(\text{BO}_3)_4$                                      | Isolated $\text{BO}_3$                            | $R32$      | 1      |
| 52 | $\alpha\text{-NdAl}_3(\text{BO}_3)_4$                              | Isolated $\text{BO}_3$                            | $C2/c$     | 1      |
| 53 | $\beta\text{-NdAl}_3(\text{BO}_3)_4$                               | Isolated $\text{BO}_3$                            | $C2/c$     | 1      |
| 54 | $\alpha\text{-GdAl}_3(\text{BO}_3)_4$                              | Isolated $\text{BO}_3$                            | $R32$      | 1      |
| 55 | $\beta\text{-GdAl}_3(\text{BO}_3)_4$                               | Isolated $\text{BO}_3$                            | $R32$      | 1      |
| 56 | $\text{PrAl}_3(\text{BO}_3)_4$                                     | Isolated $\text{BO}_3$                            | $C2/c$     | 1      |
| 57 | $\text{HoAl}_3(\text{BO}_3)_4$                                     | Isolated $\text{BO}_3$                            | $R32$      | 1      |
| 58 | $\alpha\text{-ErAl}_3(\text{BO}_3)_4$                              | Isolated $\text{BO}_3$                            | $R32$      | 1      |
| 59 | $\beta\text{-ErAl}_3(\text{BO}_3)_4$                               | Isolated $\text{BO}_3$                            | $C2$       | 1      |
| 60 | $\text{TmAl}_3(\text{BO}_3)_4$                                     | Isolated $\text{BO}_3$                            | $R32$      | 1      |
| 61 | $\text{YbAl}_3(\text{BO}_3)_4$                                     | Isolated $\text{BO}_3$                            | $R32$      | 1      |
| 62 | $\text{NaBa}_4\text{Al}_2\text{B}_8\text{O}_{18}\text{Cl}_3$       | Isolated $\text{B}_4\text{O}_9$                   | $P4_2nm$   | 0.875  |
| 63 | $\text{NaBa}_4(\text{A}0.875\text{B}_4\text{O}_9)_2\text{Br}_3$    | Isolated $\text{B}_4\text{O}_9$                   | $P4_2nm$   | 0.875  |
| 64 | $\text{Li}_7\text{BaAlB}_{12}\text{O}_{24}$                        | $\text{B}_6\text{O}_{14}$ chain                   | $R-3$      | 0.75   |
| 65 | $\text{Li}_7\text{SrAlB}_{12}\text{O}_{24}$                        | $\text{B}_6\text{O}_{14}$ chain                   | $R-3$      | 0.75   |
| 66 | $\text{Li}_5\text{MgSrAlB}_{12}\text{O}_{24}$                      | $\text{B}_2\text{O}_6$ chain                      | $R-3$      | 0.75   |
| 67 | $\text{Li}_5\text{ZnSrAlB}_{12}\text{O}_{24}$                      | $\text{B}_2\text{O}_6$ chain                      | $R-3$      | 0.75   |
| 68 | $\text{Cs}(\text{Al}_4\text{Be}_4\text{B}_{12}\text{O}_{28})$      | $\text{BO}_4$ 3D-network                          | $P-43m$    | 0.75   |
| 69 | $\text{Ba}_2\text{AlB}_4\text{O}_9\text{Cl}$                       | Isolated $\text{B}_4\text{O}_9$                   | $P4_2nm$   | 0.75   |
| 70 | $\text{CsAlB}_3\text{O}_6\text{F}$                                 | Isolated $\text{B}_3\text{O}_6$                   | $Pna2_1$   | 0.75   |
| 71 | $\text{RbAlB}_3\text{O}_6\text{F}$                                 | Isolated $\text{B}_3\text{O}_6$                   | $Pna2_1$   | 0.75   |
| 72 | $\text{Cs}0.5\text{Rb}0.5\text{AlB}_3\text{O}_6\text{F}$           | Isolated $\text{B}_3\text{O}_6$                   | $P-62c$    | 0.75   |
| 73 | $\text{Cs}_{0.55}\text{Al}_4\text{B}_{12}\text{Be}_5\text{O}_{28}$ | $\text{BO}_4$ 3D-network                          | $P-43m$    | 0.7125 |
| 74 | $\text{Ba}_6\text{Al}_4\text{B}_{14}\text{O}_{33}$                 | Isolated $\text{B}_6\text{O}_{14}$                | $P-1$      | 0.714  |
| 75 | $\text{Al}_4(\text{B}_6\text{O}_{15})$                             | Isolated $\text{B}_2\text{O}_5$                   | $R3$       | 0.66   |
| 76 | $\text{Cs}_3\text{AlB}_6\text{O}_{12}$                             | Isolated $\text{B}_{12}\text{O}_{24}$             | $P2_1/c$   | 0.66   |
| 77 | $\text{CaAl}(\text{B}_3\text{O}_7)$                                | $\text{BO}_4$ layer                               | $Cmma$     | 0.66   |
| 78 | $\text{SrAlB}_3\text{O}_6\text{F}_2$                               | $\text{B}_3\text{O}_6$ chain                      | $P2_1/c$   | 0.66   |
| 79 | $\text{Cs}_3\text{AlB}_6\text{O}_{12}$                             | Isolated $\text{B}_{12}\text{O}_{24}$             | $P2_1/c$   | 0.66   |
| 80 | $\text{Li}_2(\text{AlB}_5\text{O}_{10})$                           | Isolated $\text{B}_5\text{O}_{10}$                | $P2_1/c$   | 0.6    |
| 81 | $\text{Cs}_2\text{AlB}_5\text{O}_{10}$                             | Isolated $\text{B}_5\text{O}_{10}$                | $P3_121$   | 0.6    |
| 82 | $\text{NaSr}_7\text{Al}(\text{B}_{18}\text{O}_{36})$               | Isolated $\text{B}_{18}\text{O}_{36}$             | $R-3c$     | 0.5    |
| 83 | $\text{K}_3\text{AlB}_8\text{O}_{15}$                              | $\text{B}_8\text{O}_{15}$ chain                   | $P2_1/c$   | 0.5    |

**Table S5** F-containing aluminum borates in the reported structures.

| <b>No.</b> | <b>Compounds</b>                                                              | <b>B-O groups</b>                                 | <b>Al-O/F configuration</b>               |
|------------|-------------------------------------------------------------------------------|---------------------------------------------------|-------------------------------------------|
| <b>1</b>   | $\text{K}_3\text{Sr}_3\text{Li}_2\text{Al}_4\text{B}_6\text{O}_{20}\text{F}$  | Isolated $\text{BO}_3$                            | $\text{AlO}_4$                            |
| <b>2</b>   | $\text{K}_3\text{Ba}_3\text{Li}_2\text{Al}_4\text{B}_6\text{O}_{20}\text{F}$  | Isolated $\text{BO}_3$                            | $\text{AlO}_4$                            |
| <b>3</b>   | $\text{Rb}_3\text{Ba}_3\text{Li}_2\text{Al}_4\text{B}_6\text{O}_{20}\text{F}$ | Isolated $\text{BO}_3$                            | $\text{AlO}_4$                            |
| <b>4</b>   | $\text{NaFe}_3\text{B}_3\text{Al}_6\text{Si}_6\text{O}_{30}\text{F}$          | Isolated $\text{BO}_3$                            | $\text{AlO}_6$                            |
| <b>5</b>   | $\text{CsAlB}_3\text{O}_6\text{F}$                                            | Isolated $\text{B}_3\text{O}_6$                   | $\text{AlO}_3\text{F}$                    |
| <b>6</b>   | $\text{RbAlB}_3\text{O}_6\text{F}$                                            | Isolated $\text{B}_3\text{O}_6$                   | $\text{AlO}_3\text{F}$                    |
| <b>7</b>   | $\text{Rb}_3\text{Al}_3\text{B}_3\text{O}_{10}\text{F}$                       | Isolated $\text{BO}_3$                            | $\text{AlO}_4$ and $\text{AlO}_3\text{F}$ |
| <b>8</b>   | $\text{BaAl}(\text{BO}_3)_2\text{F}_2$                                        | Isolated $\text{BO}_3$                            | $\text{AlO}_3\text{F}_2$                  |
| <b>9</b>   | $\text{Al}_6(\text{BO}_3)_5\text{F}_3$                                        | Isolated $\text{BO}_3$                            | $\text{AlO}_5\text{F}$                    |
| <b>10</b>  | $\text{Al}_8(\text{BO}_3)_4(\text{B}_2\text{O}_5)\text{F}_8$                  | Isolated $\text{BO}_3$ and $\text{B}_2\text{O}_5$ | $\text{AlO}_4\text{F}_2$                  |
| <b>11</b>  | $\text{SnAl}_2(\text{BO}_3)_2\text{F}_2$                                      | Isolated $\text{BO}_3$                            | $\text{AlO}_4\text{F}_2$                  |
| <b>12</b>  | $\text{Pb}_6\text{AlF}_7\text{B}_2\text{O}_7$                                 | Isolated $\text{BO}_3$                            | $\text{AlF}_6$                            |
| <b>13</b>  | $\text{Pb}_2\text{Al}_2\text{B}_3\text{O}_8\text{F}_3$                        | Isolated $\text{B}_3\text{O}_8$                   | $\text{AlO}_4\text{F}_2$                  |

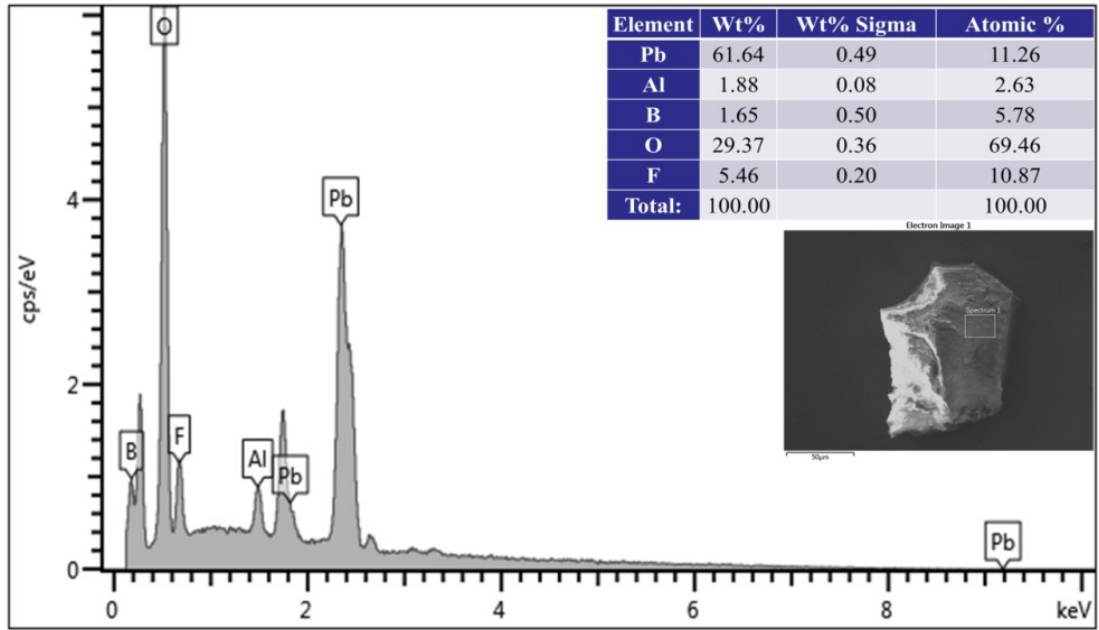

**Figure S1** X-ray energy dispersive spectrum of  $\text{Pb}_2\text{Al}_2\text{B}_3\text{O}_8\text{F}_3$  crystal.



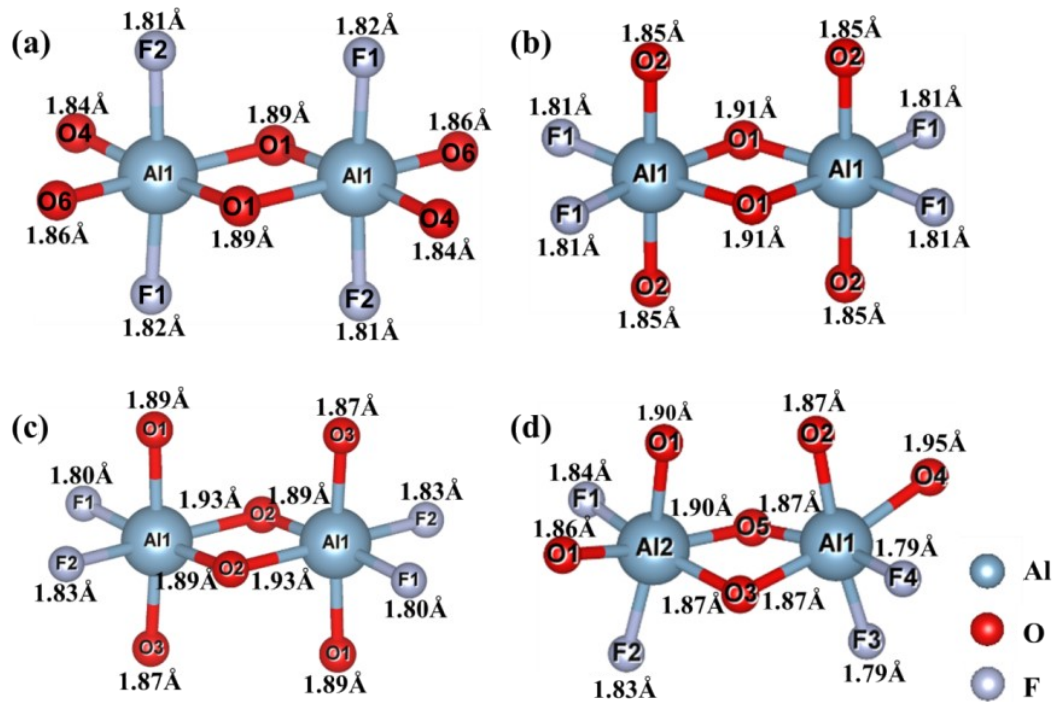

**Figure S2**  $[\text{AlO}_4\text{F}_2]^{5-}$  groups in  $\text{SrAlB}_3\text{O}_6\text{F}_2$  (a);  $\text{Al}_8(\text{BO}_3)_4(\text{B}_2\text{O}_5)\text{F}_8$  (b);  $\text{Pb}_2\text{Al}_2\text{B}_3\text{O}_8\text{F}_3$  (c); and  $\text{SnAl}_2(\text{BO}_3)_2\text{F}_2$  (d).

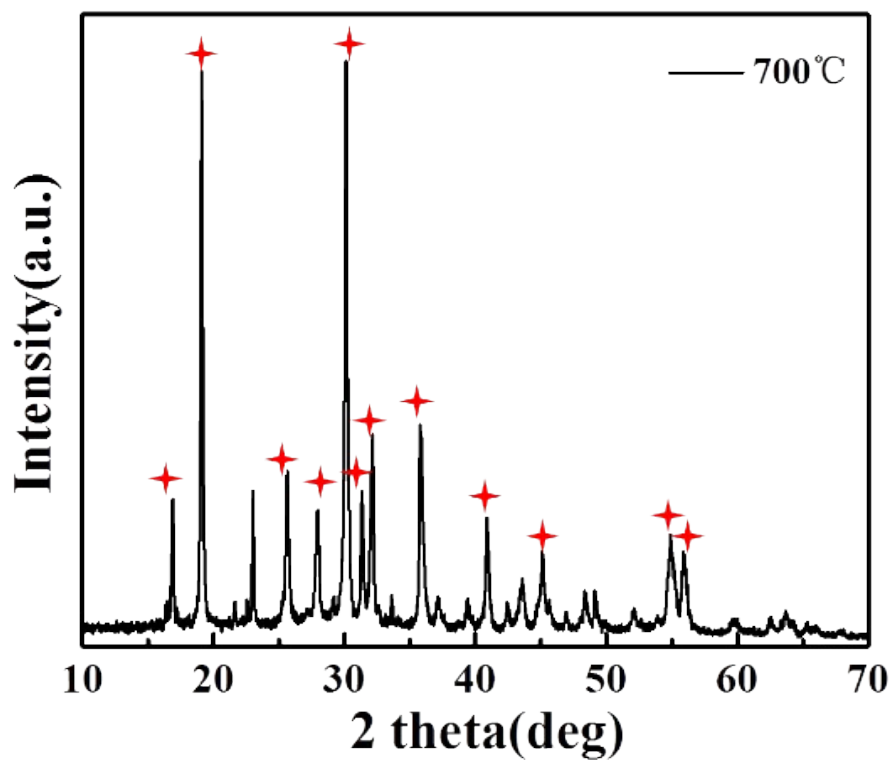

**Figure S3** The XRD pattern of calcined sample at 700 °C. The marked asterisks are  $\text{Pb}_4\text{Al}_2\text{B}_2\text{O}_{10}$  (the PDF card number in the Jade is 43-0022).
